# Supplementary material
Source: publisher site journal article supplement (https://www.dovepress.com/article/160207)
Supplement: Supplementary file 1 [file get_supplementary_file.php]

## 1 embase history queries

| No. | Query                                                                                                                                                                                                                                                                                                                                                                                            | Results | Date      |
|-----|--------------------------------------------------------------------------------------------------------------------------------------------------------------------------------------------------------------------------------------------------------------------------------------------------------------------------------------------------------------------------------------------------|---------|-----------|
| #18 | ('ovary tumor'/exp OR 'ovarian neoplasia':ab,ti OR 'ovarian neoplasm':ab,ti OR 'ovarian neoplasms':ab,ti OR 'ovarian tumor':ab,ti OR 'ovarian tumour':ab,ti OR 'ovarium tumor':ab,ti OR 'ovarium tumour':ab,ti OR 'ovary neoplasm':ab,ti OR 'ovary tumor treatment':ab,ti OR 'ovary tumour treatment':ab,ti) AND ('aldhl':ab,ti OR 'aldhl enzyme':ab,ti OR 'acetaldehyde dehydrogenase 1':ab,ti) | 93      | 25-Oct-17 |
| #17 | aldhl':ab,ti OR 'aldhl enzyme':ab,ti OR 'acetaldehyde dehydrogenase 1':ab,ti                                                                                                                                                                                                                                                                                                                     | 1510    | 25-Oct-17 |
| #16 | acetaldehyde dehydrogenase 1':ab,ti                                                                                                                                                                                                                                                                                                                                                              | 12      | 25-Oct-17 |
| #15 | aldhl enzyme':ab,ti                                                                                                                                                                                                                                                                                                                                                                              | 10      | 25-Oct-17 |
| #14 | aldhl':ab,ti                                                                                                                                                                                                                                                                                                                                                                                     | 1505    | 25-Oct-17 |
| #13 | ovary tumor'/exp OR 'ovarian neoplasia':ab,ti OR 'ovarian neoplasm':ab,ti OR 'ovarian neoplasms':ab,ti OR 'ovarian tumor':ab,ti OR 'ovarian tumour':ab,ti OR 'ovarium tumor':ab,ti OR 'ovarium tumour':ab,ti OR 'ovary neoplasm':ab,ti OR 'ovary tumor treatment':ab,ti OR 'ovary tumour treatment':ab,ti                                                                                        | 127874  | 25-Oct-17 |
| #12 | ovary tumour treatment':ab,ti                                                                                                                                                                                                                                                                                                                                                                    | 0       | 25-Oct-17 |
| #11 | ovary tumour':ab,ti                                                                                                                                                                                                                                                                                                                                                                              | 20      | 25-Oct-17 |
| #10 | ovary tumor treatment':ab,ti                                                                                                                                                                                                                                                                                                                                                                     | 1       | 25-Oct-17 |
| #9  | ovary neoplasm':ab,ti                                                                                                                                                                                                                                                                                                                                                                            | 6       | 25-Oct-17 |
| #8  | ovarium tumour':ab,ti                                                                                                                                                                                                                                                                                                                                                                            | 0       | 25-Oct-17 |
| #7  | ovarium tumor':ab,ti                                                                                                                                                                                                                                                                                                                                                                             | 1       | 25-Oct-17 |
| #6  | ovarian tumour':ab,ti                                                                                                                                                                                                                                                                                                                                                                            | 1128    | 25-Oct-17 |
| #5  | ovarian tumor':ab,ti                                                                                                                                                                                                                                                                                                                                                                             | 6369    | 25-Oct-17 |
| #4  | ovarian neoplasms':ab,ti                                                                                                                                                                                                                                                                                                                                                                         | 1592    | 25-Oct-17 |
| #3  | ovarian neoplasm':ab,ti                                                                                                                                                                                                                                                                                                                                                                          | 628     | 25-Oct-17 |
| #2  | ovarian neoplasia':ab,ti                                                                                                                                                                                                                                                                                                                                                                         | 229     | 25-Oct-17 |
| #1  | ovary tumor'/exp                                                                                                                                                                                                                                                                                                                                                                                 | 126914  | 25-Oct-17 |

## 2 Recent queries in pubmed

| Search | Query | Items found | Time |
|--------|-------|-------------|------|
|--------|-------|-------------|------|

|     |                                                                                                                                                                                                                                                                                                                                                                                                                                                                                                                                                                                                                                                                                                                                                                                                                                                                                                                                                                                                                                                                                                                                                                                                      |      |          |
|-----|------------------------------------------------------------------------------------------------------------------------------------------------------------------------------------------------------------------------------------------------------------------------------------------------------------------------------------------------------------------------------------------------------------------------------------------------------------------------------------------------------------------------------------------------------------------------------------------------------------------------------------------------------------------------------------------------------------------------------------------------------------------------------------------------------------------------------------------------------------------------------------------------------------------------------------------------------------------------------------------------------------------------------------------------------------------------------------------------------------------------------------------------------------------------------------------------------|------|----------|
| #37 | <p>Search (((("aldehyde dehydrogenase 1"<br/> [Supplementary Concept])) OR<br/> ALDH1[Title/Abstract]) OR ALDH1<br/> enzyme[Title/Abstract]) OR acetaldehyde<br/> dehydrogenase 1[Title/Abstract])) AND<br/> ((((((((((((((((("Ovarian Neoplasms"[Mesh])<br/> OR "Neoplasm, Ovarian" [Title/Abstract]) OR<br/> Ovarian Neoplasm[Title/Abstract]) OR Ovary<br/> Neoplasms[Title/Abstract]) OR "Neoplasm,<br/> Ovary" [Title/Abstract]) OR "Neoplasms,<br/> Ovary" [Title/Abstract]) OR Ovary<br/> Neoplasm[Title/Abstract]) OR "Neoplasms,<br/> Ovarian" [Title/Abstract]) OR Ovary<br/> Cancer[Title/Abstract]) OR "Cancer,<br/> Ovary" [Title/Abstract]) OR "Cancers,<br/> Ovary" [Title/Abstract]) OR Ovary<br/> Cancers[Title/Abstract]) OR Ovarian<br/> Cancer[Title/Abstract]) OR "Cancer,<br/> Ovarian" [Title/Abstract]) OR "Cancers,<br/> Ovarian" [Title/Abstract]) OR Ovarian<br/> Cancers[Title/Abstract]) OR Cancer of<br/> Ovary[Title/Abstract]) OR Cancer of the<br/> Ovary[Title/Abstract])</p>                                                                                                                                                                                      | 51   | 22:11:44 |
| #36 | <p>Search (((("aldehyde dehydrogenase 1"<br/> [Supplementary Concept])) OR<br/> ALDH1[Title/Abstract]) OR ALDH1<br/> enzyme[Title/Abstract]) OR acetaldehyde<br/> dehydrogenase 1[Title/Abstract]</p> <p>Search (((((((((((((((((((("Ovarian<br/> Neoplasms"[Mesh]) OR "Neoplasm,<br/> Ovarian" [Title/Abstract]) OR Ovarian<br/> Neoplasm[Title/Abstract]) OR Ovary<br/> Neoplasms[Title/Abstract]) OR "Neoplasm,<br/> Ovary" [Title/Abstract]) OR "Neoplasms,<br/> Ovary" [Title/Abstract]) OR Ovary<br/> Neoplasm[Title/Abstract]) OR "Neoplasms,<br/> Ovarian" [Title/Abstract]) OR Ovary<br/> Cancer[Title/Abstract]) OR "Cancer,<br/> Ovary" [Title/Abstract]) OR "Cancers,<br/> Ovary" [Title/Abstract]) OR Ovary<br/> Cancers[Title/Abstract]) OR Ovarian<br/> Cancer[Title/Abstract]) OR "Cancer,<br/> Ovarian" [Title/Abstract]) OR "Cancers,<br/> Ovarian" [Title/Abstract]) OR Ovarian<br/> Cancers[Title/Abstract]) OR Cancer of the<br/> Ovary[Title/Abstract]) OR Ovarian<br/> Neoplasms[Title/Abstract]) OR Cancer of<br/> Ovary[Title/Abstract])) AND<br/> ((ALDH1[Title/Abstract]) OR ALDH1<br/> enzyme[Title/Abstract]) OR acetaldehyde<br/> dehydrogenase 1[Title/Abstract])</p> | 1059 | 22:11:14 |
| #35 | <p>Search (((((((((((((((((((("Ovarian<br/> Neoplasms"[Mesh]) OR "Neoplasm,<br/> Ovarian" [Title/Abstract]) OR Ovarian<br/> Neoplasm[Title/Abstract]) OR Ovary<br/> Neoplasms[Title/Abstract]) OR "Neoplasm,<br/> Ovary" [Title/Abstract]) OR "Neoplasms,<br/> Ovary" [Title/Abstract]) OR Ovary<br/> Neoplasm[Title/Abstract]) OR "Neoplasms,<br/> Ovarian" [Title/Abstract]) OR Ovary<br/> Cancer[Title/Abstract]) OR "Cancer,<br/> Ovary" [Title/Abstract]) OR "Cancers,<br/> Ovary" [Title/Abstract]) OR Ovary<br/> Cancers[Title/Abstract]) OR Ovarian<br/> Cancer[Title/Abstract]) OR "Cancer,<br/> Ovarian" [Title/Abstract]) OR "Cancers,<br/> Ovarian" [Title/Abstract]) OR Ovarian<br/> Cancers[Title/Abstract]) OR Cancer of the<br/> Ovary[Title/Abstract]) OR Ovarian<br/> Neoplasms[Title/Abstract]) OR Cancer of<br/> Ovary[Title/Abstract])) AND<br/> ((ALDH1[Title/Abstract]) OR ALDH1<br/> enzyme[Title/Abstract]) OR acetaldehyde<br/> dehydrogenase 1[Title/Abstract])</p>                                                                                                                                                                                                       | 49   | 21:53:49 |

|     |                                                                                                                                                                                                                                                                                                                                                                                                                                                                                                                                                                                                                                                                                                                                                                                                                                      |       |          |
|-----|--------------------------------------------------------------------------------------------------------------------------------------------------------------------------------------------------------------------------------------------------------------------------------------------------------------------------------------------------------------------------------------------------------------------------------------------------------------------------------------------------------------------------------------------------------------------------------------------------------------------------------------------------------------------------------------------------------------------------------------------------------------------------------------------------------------------------------------|-------|----------|
| #34 | Search (((((((((((((((("Ovarian Neoplasms"[Mesh]) OR "Neoplasm, Ovarian" [Title/Abstract]) OR Ovarian Neoplasm[Title/Abstract]) OR Ovary Neoplasms[Title/Abstract]) OR "Neoplasm, Ovary" [Title/Abstract]) OR "Neoplasms, Ovary" [Title/Abstract]) OR Ovary Neoplasm[Title/Abstract]) OR "Neoplasms, Ovarian" [Title/Abstract]) OR Ovary Cancer[Title/Abstract]) OR "Cancer, Ovary" [Title/Abstract]) OR "Cancers, Ovary" [Title/Abstract]) OR Ovary Cancers[Title/Abstract]) OR Ovarian Cancer[Title/Abstract]) OR "Cancer, Ovarian" [Title/Abstract]) OR "Cancers, Ovarian" [Title/Abstract]) OR Ovarian Cancers[Title/Abstract]) OR Cancer of the Ovary[Title/Abstract]) OR Ovarian Neoplasms[Title/Abstract]) OR Cancer of Ovary[Title/Abstract]                                                                                 | 88345 | 21:53:17 |
| #33 | Search Ovarian Neoplasms[Title/Abstract]<br>Search (((((((((((((((("Ovarian Neoplasms"[Mesh]) OR "Neoplasm, Ovarian" [Title/Abstract]) OR Ovarian Neoplasm[Title/Abstract]) OR Ovary Neoplasms[Title/Abstract]) OR "Neoplasm, Ovary" [Title/Abstract]) OR "Neoplasms, Ovary" [Title/Abstract]) OR Ovary Neoplasm[Title/Abstract]) OR "Neoplasms, Ovarian" [Title/Abstract]) OR Ovary Cancer[Title/Abstract]) OR "Cancer, Ovary" [Title/Abstract]) OR "Cancers, Ovary" [Title/Abstract]) OR Ovary Cancers[Title/Abstract]) OR Ovarian Cancer[Title/Abstract]) OR "Cancer, Ovarian" [Title/Abstract]) OR "Cancers, Ovarian" [Title/Abstract]) OR Ovarian Cancers[Title/Abstract]) OR Cancer of Ovary[Title/Abstract])) AND (((ALDH1[Title/Abstract]) OR ALDH1 enzyme[Title/Abstract]) OR acetaldehyde dehydrogenase 1[Title/Abstract]) | 2542  | 21:47:28 |
| #32 | Search ((ALDH1[Title/Abstract]) OR ALDH1 enzyme[Title/Abstract]) OR acetaldehyde dehydrogenase 1[Title/Abstract])                                                                                                                                                                                                                                                                                                                                                                                                                                                                                                                                                                                                                                                                                                                    | 49    | 21:46:14 |
| #31 | Search ((ALDH1[Title/Abstract]) OR ALDH1 enzyme[Title/Abstract]) OR acetaldehyde dehydrogenase 1[Title/Abstract]                                                                                                                                                                                                                                                                                                                                                                                                                                                                                                                                                                                                                                                                                                                     | 865   | 21:45:47 |
| #30 | Search acetaldehyde dehydrogenase 1[Title/Abs                                                                                                                                                                                                                                                                                                                                                                                                                                                                                                                                                                                                                                                                                                                                                                                        | 8     | 21:45:26 |
| #29 | Search ALDH1 enzyme[Title/Abstract]                                                                                                                                                                                                                                                                                                                                                                                                                                                                                                                                                                                                                                                                                                                                                                                                  | 7     | 21:45:02 |
| #28 | Search ALDH1[Title/Abstract]                                                                                                                                                                                                                                                                                                                                                                                                                                                                                                                                                                                                                                                                                                                                                                                                         | 864   | 21:44:41 |
| #26 | Search "aldehyde dehydrogenase 1" [Supplement.                                                                                                                                                                                                                                                                                                                                                                                                                                                                                                                                                                                                                                                                                                                                                                                       | 546   | 21:43:02 |

|     |                                                                                                                                                                                                                                                                                                                                                                                                                                                                                                                                                                                                                                                                                                                                                                      |       |          |
|-----|----------------------------------------------------------------------------------------------------------------------------------------------------------------------------------------------------------------------------------------------------------------------------------------------------------------------------------------------------------------------------------------------------------------------------------------------------------------------------------------------------------------------------------------------------------------------------------------------------------------------------------------------------------------------------------------------------------------------------------------------------------------------|-------|----------|
|     | Search (((((((((((((((("Ovarian<br>Neoplasms"[Mesh]) OR "Neoplasm,<br>Ovarian" [Title/Abstract]) OR Ovarian<br>Neoplasm[Title/Abstract]) OR Ovary<br>Neoplasms[Title/Abstract]) OR "Neoplasm,<br>Ovary" [Title/Abstract]) OR "Neoplasms,<br>Ovary" [Title/Abstract]) OR Ovary<br>Neoplasm[Title/Abstract]) OR "Neoplasms,<br>Ovarian" [Title/Abstract]) OR Ovary<br>Cancer[Title/Abstract]) OR "Cancer,<br>Ovary" [Title/Abstract]) OR "Cancers,<br>Ovary" [Title/Abstract]) OR Ovary<br>Cancers[Title/Abstract]) OR Ovarian<br>Cancer[Title/Abstract]) OR "Cancer,<br>Ovarian" [Title/Abstract]) OR "Cancers,<br>Ovarian" [Title/Abstract]) OR Ovarian<br>Cancers[Title/Abstract]) OR Cancer of<br>Ovary[Title/Abstract]) OR Cancer of the<br>Ovary[Title/Abstract] | 88148 | 21:42:08 |
| #24 |                                                                                                                                                                                                                                                                                                                                                                                                                                                                                                                                                                                                                                                                                                                                                                      |       |          |
| #23 | Search Cancer of the Ovary[Title/Abstract]                                                                                                                                                                                                                                                                                                                                                                                                                                                                                                                                                                                                                                                                                                                           | 490   | 21:40:19 |
| #22 | Search Cancer of Ovary[Title/Abstract]                                                                                                                                                                                                                                                                                                                                                                                                                                                                                                                                                                                                                                                                                                                               | 15    | 21:39:59 |
| #21 | Search Ovarian Cancers[Title/Abstract]                                                                                                                                                                                                                                                                                                                                                                                                                                                                                                                                                                                                                                                                                                                               | 5280  | 21:39:39 |
| #19 | Search "Cancers, Ovarian" [Title/Abstract]                                                                                                                                                                                                                                                                                                                                                                                                                                                                                                                                                                                                                                                                                                                           | 0     | 21:39:18 |
| #20 | Search "Cancers, Ovarian" [Title/Abstract]<br>Schema: all                                                                                                                                                                                                                                                                                                                                                                                                                                                                                                                                                                                                                                                                                                            | 0     | 21:39:18 |
| #18 | Search "Cancer, Ovarian" [Title/Abstract]                                                                                                                                                                                                                                                                                                                                                                                                                                                                                                                                                                                                                                                                                                                            | 4     | 21:38:49 |
| #17 | Search Ovarian Cancer[Title/Abstract]                                                                                                                                                                                                                                                                                                                                                                                                                                                                                                                                                                                                                                                                                                                                | 44116 | 21:38:14 |
| #16 | Search Ovary Cancers[Title/Abstract]                                                                                                                                                                                                                                                                                                                                                                                                                                                                                                                                                                                                                                                                                                                                 | 50    | 21:37:53 |
| #15 | Search "Cancers, Ovary" [Title/Abstract]<br>Schema: all                                                                                                                                                                                                                                                                                                                                                                                                                                                                                                                                                                                                                                                                                                              | 0     | 21:37:33 |
| #14 | Search "Cancers, Ovary" [Title/Abstract]                                                                                                                                                                                                                                                                                                                                                                                                                                                                                                                                                                                                                                                                                                                             | 0     | 21:37:33 |
| #13 | Search "Cancer, Ovary" [Title/Abstract]                                                                                                                                                                                                                                                                                                                                                                                                                                                                                                                                                                                                                                                                                                                              | 1     | 21:37:11 |
| #12 | Search Ovary Cancer[Title/Abstract]                                                                                                                                                                                                                                                                                                                                                                                                                                                                                                                                                                                                                                                                                                                                  | 323   | 21:36:40 |
| #11 | Search "Neoplasms, Ovarian" [Title/Abstract]                                                                                                                                                                                                                                                                                                                                                                                                                                                                                                                                                                                                                                                                                                                         | 1     | 21:36:19 |
| #10 | Search Ovary Neoplasm[Title/Abstract]                                                                                                                                                                                                                                                                                                                                                                                                                                                                                                                                                                                                                                                                                                                                | 12    | 21:35:48 |
| #9  | Search "Neoplasms, Ovary" [Title/Abstract]<br>Schema: all                                                                                                                                                                                                                                                                                                                                                                                                                                                                                                                                                                                                                                                                                                            | 0     | 21:35:23 |
| #8  | Search "Neoplasms, Ovary" [Title/Abstract]                                                                                                                                                                                                                                                                                                                                                                                                                                                                                                                                                                                                                                                                                                                           | 0     | 21:35:22 |
| #7  | Search "Neoplasm, Ovary" [Title/Abstract]                                                                                                                                                                                                                                                                                                                                                                                                                                                                                                                                                                                                                                                                                                                            | 1     | 21:34:41 |
| #6  | Search Ovary Neoplasms[Title/Abstract]                                                                                                                                                                                                                                                                                                                                                                                                                                                                                                                                                                                                                                                                                                                               | 672   | 21:34:01 |
| #5  | Search Ovarian Neoplasm[Title/Abstract]                                                                                                                                                                                                                                                                                                                                                                                                                                                                                                                                                                                                                                                                                                                              | 574   | 21:33:38 |
| #4  | Search "Neoplasm, Ovarian" [Title/Abstract]                                                                                                                                                                                                                                                                                                                                                                                                                                                                                                                                                                                                                                                                                                                          | 1     | 21:33:08 |
| #3  | Search "Ovarian Neoplasms"[Mesh]                                                                                                                                                                                                                                                                                                                                                                                                                                                                                                                                                                                                                                                                                                                                     | 75092 | 21:31:41 |

### 3 CBM history

|     |                                           |       |         |
|-----|-------------------------------------------|-------|---------|
| #11 | (#10) AND (#9)                            | 21    | 9:09:09 |
| #10 | ("ALDH1"[全字段:智能]) OR "乙醛脱氢酶<br>1"[全字段:智能] | 247   | 9:08:37 |
| #9  | (#8) OR (#1)                              | 33544 | 9:06:53 |

|    |                                                                                                    |       |          |
|----|----------------------------------------------------------------------------------------------------|-------|----------|
| #8 | ((("卵巢类癌"[全字段:智能]) OR "卵巢恶性肿瘤"[全字段:智能]) OR "卵巢上皮癌"[全字段:智能]) OR "卵巢肿瘤"[全字段:智能]) OR "卵巢上皮性癌"[全字段:智能] | 33544 | 9:05:54  |
| #6 | ((("卵巢恶性肿瘤"[全字段:智能]) OR "卵巢上皮癌"[全字段:智能]) OR "卵巢肿瘤"[全字段:智能]) OR "卵巢上皮性癌"[全字段:智能]                    | 33540 | 9:00:29  |
| #5 | (#4) AND (#3)                                                                                      | 20    | 8:41:17  |
| #4 | (#2) OR (#1)                                                                                       | 32887 | 8:40:56  |
| #3 | ("ALDH1"[摘要:智能]) OR "乙醛脱氢酶1"[摘要:智能]                                                                | 238   | 8:39:39  |
| #2 | ((("卵巢类癌"[摘要:智能]) OR "卵巢恶性肿瘤"[摘要:智能]) OR "卵巢上皮癌"[摘要:智能]) OR "卵巢肿瘤"[摘要:智能]) OR "卵巢上皮性癌"[摘要:智能]      | 22263 | 8:37:43  |
| #1 | "卵巢肿瘤"[不加权:扩展]                                                                                     | 29801 | 08:27:58 |
